# Supplementary material for: Fumarylacetoacetate Hydrolase Knock-out Rabbit Model for Hereditary Tyrosinemia Type 1
Source: PubMed Central journal article supplement (PMC5377789; doi:10.1074/jbc.m116.764787), 2017-01-04
Supplement: 10.1074_M116.764787_jbc.M116.764787-1.pdf [file 10.1074_M116.764787_jbc.M116.764787-1.pdf]

## Supplemental Table I

| Figure                    | Genotype                                   | No. of rabbits | Generation |
|---------------------------|--------------------------------------------|----------------|------------|
| 1D and E, group 1         | (+2, +2), (+2, -15), (-10, -10)            | 3              | F1         |
| 1D and E, group 1         | (+2, -9), (-9, -11+1), (-10, -15)          | 3              | F2         |
| 1D and E, group 2         | (+2, +2), (-10, -10), (+2, -15), (-10, -9) | 4              | F1         |
| 1D and E, group 3         | (-10, -10)                                 | 3              | F2         |
| 1F, (-/-)                 | (+2, +2)                                   | 1              | F1         |
| 1F, (+/-)                 | (+2, WT), (-10, WT )                       | 2              | F1         |
| 2A and D, (-/-)           | (-10, -10)                                 | 3              | F2         |
| 2B and C, (-/-)           | (+2, +2), (-10, -10), (+2, -15)            | 3              | F1         |
| 2E, (-/-)                 | (-10, -10), (+2, -15)                      | 2              | F1         |
| 3, No. 1                  | (-10, WT)                                  | 1              | F2         |
| 3, No. 2                  | (+2, WT)                                   | 1              | F3         |
| 4C                        | (-10, -10)                                 | 1              | F1         |
| 5, transplanted (-/-)     | (-10, -10), (+2, -15)                      | 2              | F1         |
| 5, non-transplanted (-/-) | (+2, +2)                                   | 1              | F1         |
